# Supplementary material for: Large intergenic non-coding RNA-RoR modulates reprogramming of human induced pluripotent stem cells
Source: Springer Nature journal article supplement (doi:10.1038/ng.710), 2010-11-07
Supplement: 41588_2010_BFng710_MOESM20_ESM.pdf [file 41588_2010_BFng710_MOESM20_ESM.pdf]

# **Supplementary Information**

## **Large intergenic non-coding RNA-RoR modulates reprogramming of human induced pluripotent stem cells**

Sabine Loewer, Moran N. Cabili, Mitchell Guttman, Yui-Han Loh, Kelly Thomas, In Hyun Park, Manuel Garber, Matthew Curran, Tamer Onder, Suneet Agarwal, Philip D. Manos, Sumon Datta, Eric S. Lander, Thorsten M. Schlaeger, George Q. Daley and John L. Rinn

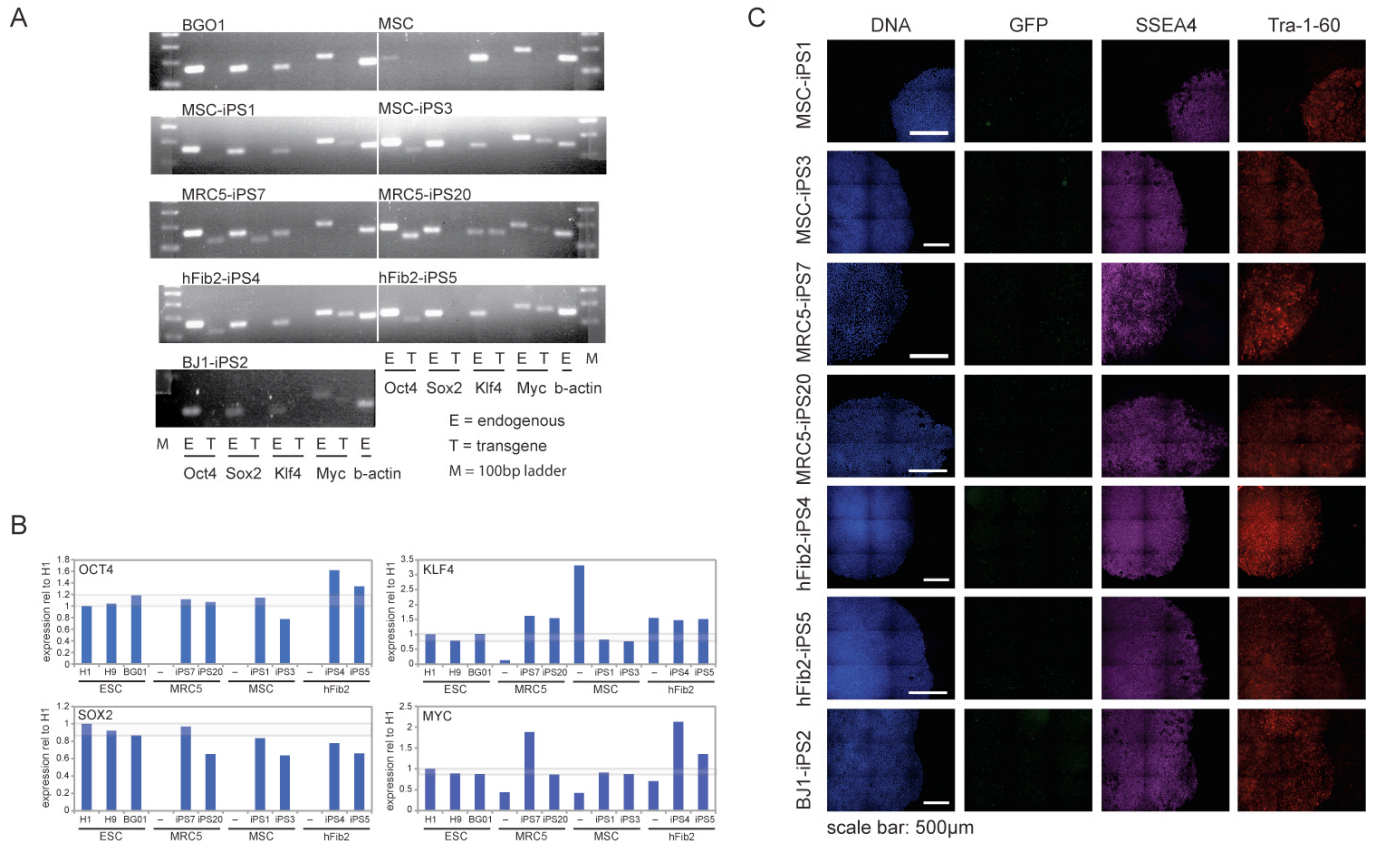

**Supplementary Figure 1:** Characterization of iPS cell lines used in this study. A) Semi-quantitative RT-PCR (30 cycles) to document silencing of retroviral transgenes in iPSC lines. BG01, MSC: ESC and fibroblast controls, respectively, for detection of pluripotency markers and absence of transgenes. B) qRT-PCR documents the total mRNA levels of reprogramming factor mRNAs of *OCT4*, *SOX2*, *KLF4*, and *MYC* in iPSC lines in comparison with the levels in ESC lines (H1, H9, BG01). mRNA levels are depicted relative to the levels in H1 ESCs. C) Fluorescence immunostaining shows upregulation of SSEA4 and Tra-1-60 surface markers, and absence of transgene expression as reflected by GFP in iPSCs. DNA was counterstained with Hoechst 33342.

A

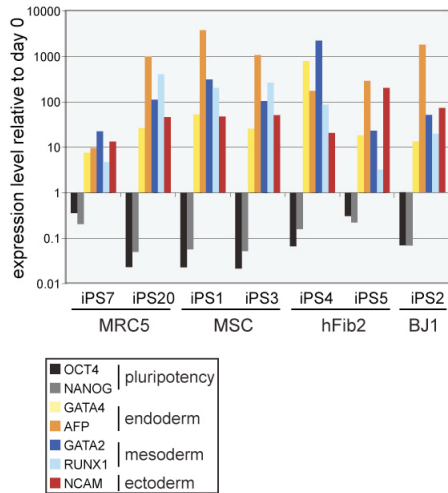

B

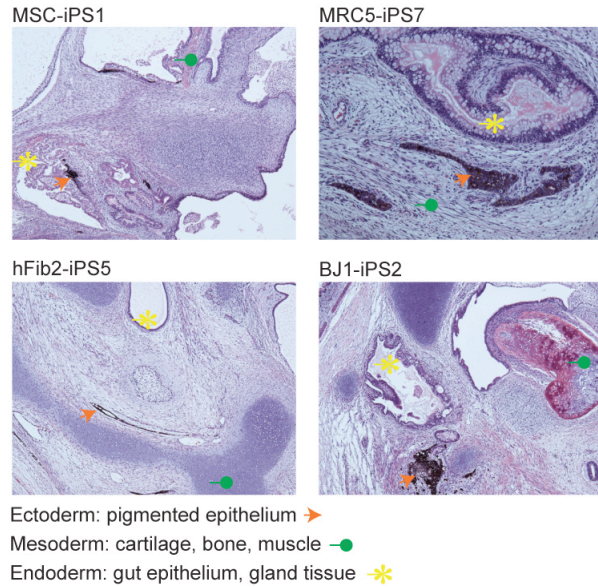

**Supplementary Figure 2:** Differentiation potential of fibroblast-derived iPSC lines. A) qRT-PCR to document the downregulation of pluripotency markers *OCT4* and *NANOG*, as well as upregulation of differentiation markers of all three germ layers on day 6 of EB differentiation relative to undifferentiated controls. B) Hematoxylin and Eosin (H+E) stained examples of teratomas showing tissues derived from all three germ layers obtained from iPSC injected into the femoral muscle of Rag2 $\gamma$ c mice.



A

Unsupervised  
hierarchical clustering

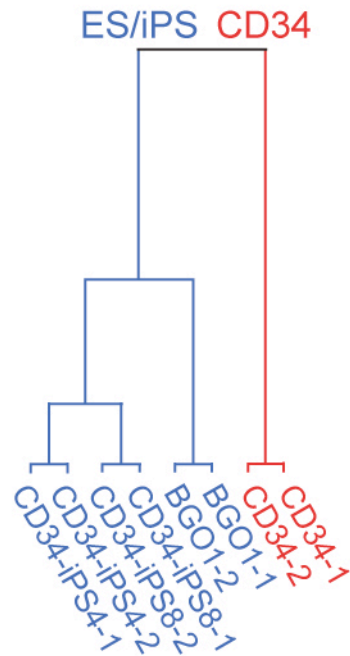

B

Supervised  
hierarchical clustering

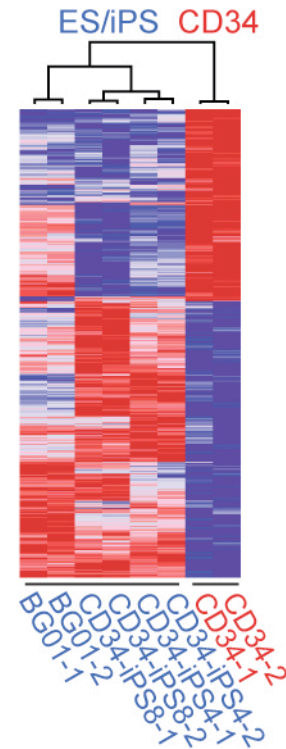

**Supplementary Figure 4:** Expression analysis of lincRNAs in CD34<sup>+</sup>-derived iPSCs. A) Unsupervised clustering of lincRNA expression segregates CD34<sup>+</sup> cells (red) from ESCs and CD34<sup>+</sup>-derived iPSCs (blue). B) Supervised clustering analysis identifies 152 lincRNAs that were differentially expressed between ESCs/iPSCs and CD34<sup>+</sup> cells (>2fold, FWER<0.05). Expression values are represented in shades of red and blue relative to being above (red) or below (blue) the median expression value across all samples (log scale 2, from -3 to +3).

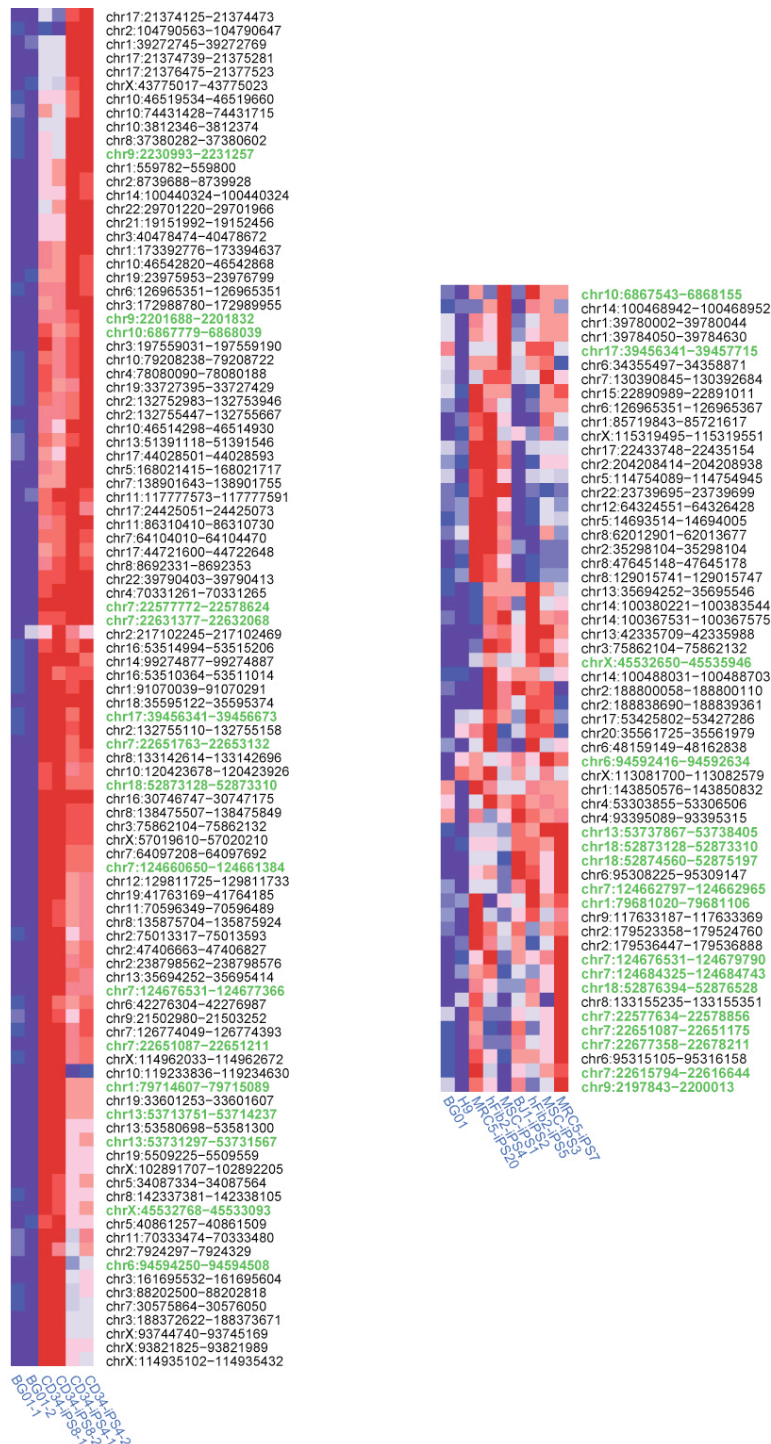

**Supplementary Figure 5:** Heatmaps from Figure 2A showing lincRNAs with elevated expression in fibroblast-derived iPSCs (left) and CD34<sup>+</sup>-derived iPSCs relative to hESCs (>2fold, FWER<0.05). The chromosomal coordinates of differentially expressed lincRNA segments are indicated, and segments corresponding to the 10 overlapping iPSC-elevated lincRNAs are highlighted in green. Expression values are represented in shades of red and blue relative to being above (red) or below (blue) the median expression value across all samples (log scale 2, from -3 to +3).

### LincRNA-VLDLR H3K4-K36 domain

chr9:2197775-2288675

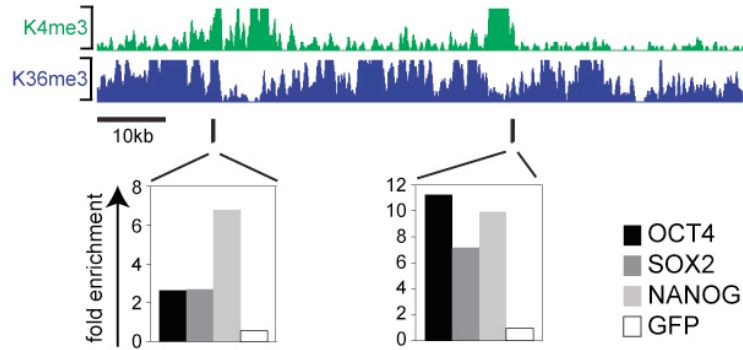

### LincRNA-SFMBT2 H3K4-K36 domain

chr10:6819700-6929500

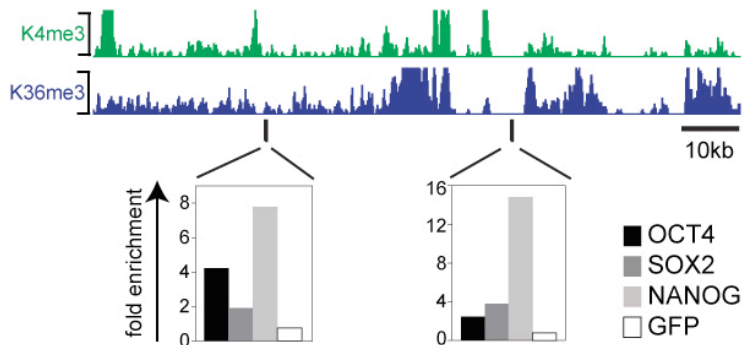

### LincRNA-ST8SIA3 H3K4-K36 domain

chr18:52872000-52892000

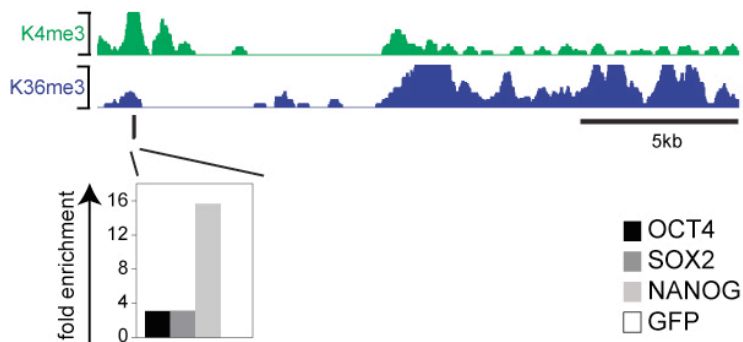

**Supplementary Figure 6:** ChIP analysis of iPSC-enriched lincRNA loci in BJ1-iPS2 cells. Top: lincRNA loci demarcated by histone H3K4me3 and H3K36me3 domains (green and blue, respectively). Bottom: ChIP in BJ1-iPS2 cells followed by qPCR analysis detects binding of OCT4, SOX2, and NANOG within lincRNA-SFMBT2, lincRNA-VLDLR, and lincRNA-ST8SIA3 regions. ChIP enrichment values are displayed normalized to a control region (chr12: 7,839,777- 7,839,966; hg18).

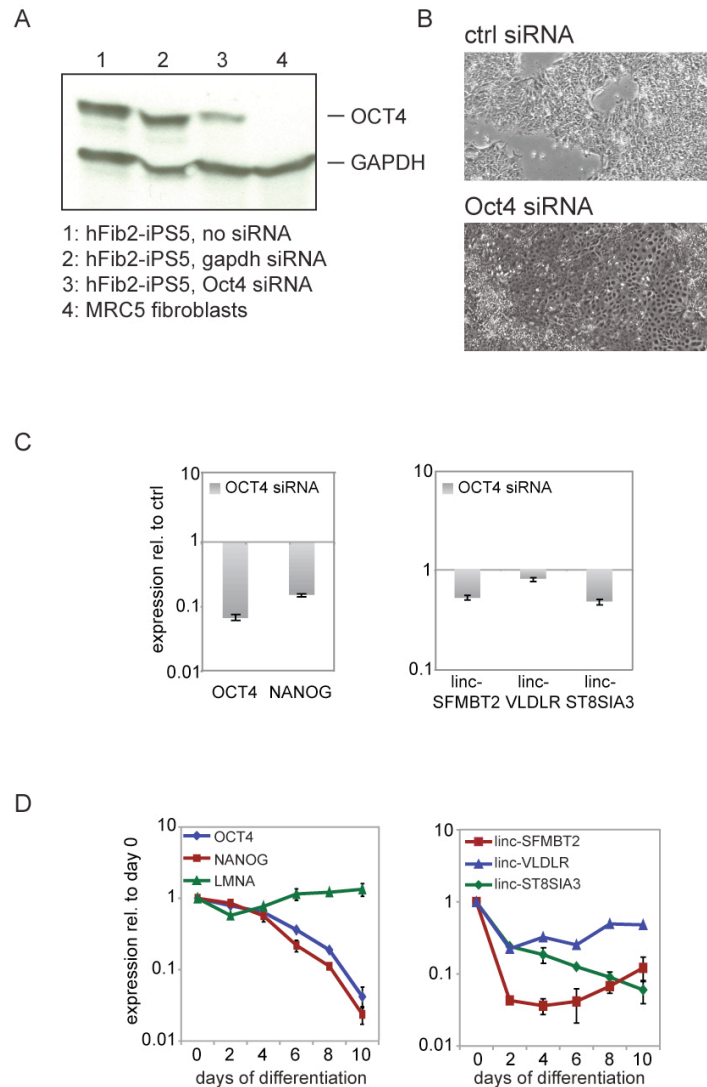

**Supplementary Figure 7:** Validation of siRNA mediated knock-down of OCT4 in hFib2-iPS5 cells and analysis of lincRNA expression upon differentiation of H9 cells. A) Western Blot showing reduction of OCT4 protein levels upon siRNA transfection. Lane 1: hFib2-iPS5 cells, no siRNA transfected; lane 2: hFib2-iPS5 cells, transfected with GAPDH control siRNA; lane 3: hFib2-iPS5 cells, transfected with OCT4 siRNA; lane 4: MRC5 fibroblasts as negative control. B) Cell morphology changes upon knock-down of OCT4 (right) compared to a control siRNA transfected sample (left). C) Changes in iPSC-enriched lincRNA levels upon siRNA-mediated knock-down of OCT4 in H9 ESCs. Left: qRT-PCR of *OCT4* and *NANOG* transcript levels upon depletion of OCT4. Right: qRT-PCR of iPSC-enriched lincRNA levels upon depletion of OCT4. Transcript levels are displayed relative to non-targeting control siRNAs (ctrl siRNA) (n=3, error bars +/-s.e.m). C) iPSC-enriched lincRNA expression during EB differentiation of H9 ESCs. Left: qRT-PCR analysis monitoring transcript levels of pluripotency markers (*OCT4* and *NANOG*) and the differentiation marker *LMNA* over a ten day differentiation time-course; right: qRT-PCR analysis of iPSC-enriched lincRNAs. RNA levels are depicted relative to undifferentiated cells (n=2, error bars +/-s.e.m).



A

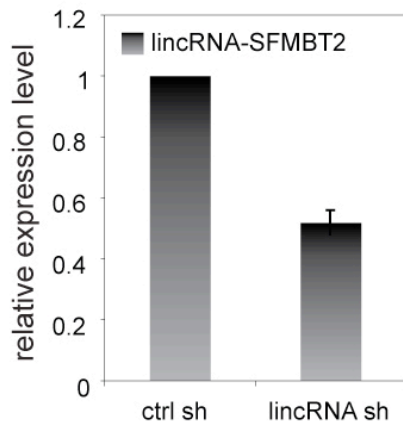

B

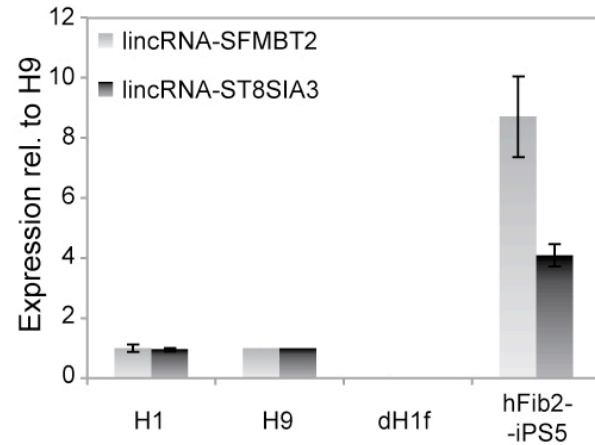

C

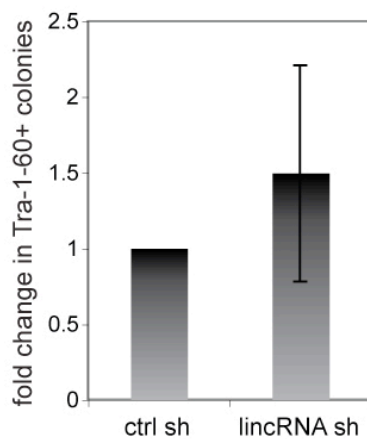

**Supplementary Figure 8:** Effect of lincRNA knock-down on reprogramming. A) qRT-PCR to document the efficiency of lincRNA-SFMBT2 knock-down following infection with shRNA-expressing lentivirus relative to a non-targeting control (n=4, error bar +/- s.e.m). B) qRT-PCR shows that lincRNA-SFMBT2 and lincRNA-ST8SIA3 are not expressed in dh1f fibroblasts prior to reprogramming (n=2, error bar +/- s.e.m.). Expression values are depicted relative to the levels in H9 cells. C) Quantification of iPSC colonies derived from dh1f cells upon knock-down of lincRNA-SFMBT2 relative to a non-targeting control (n=2, error bar +/- stdv).

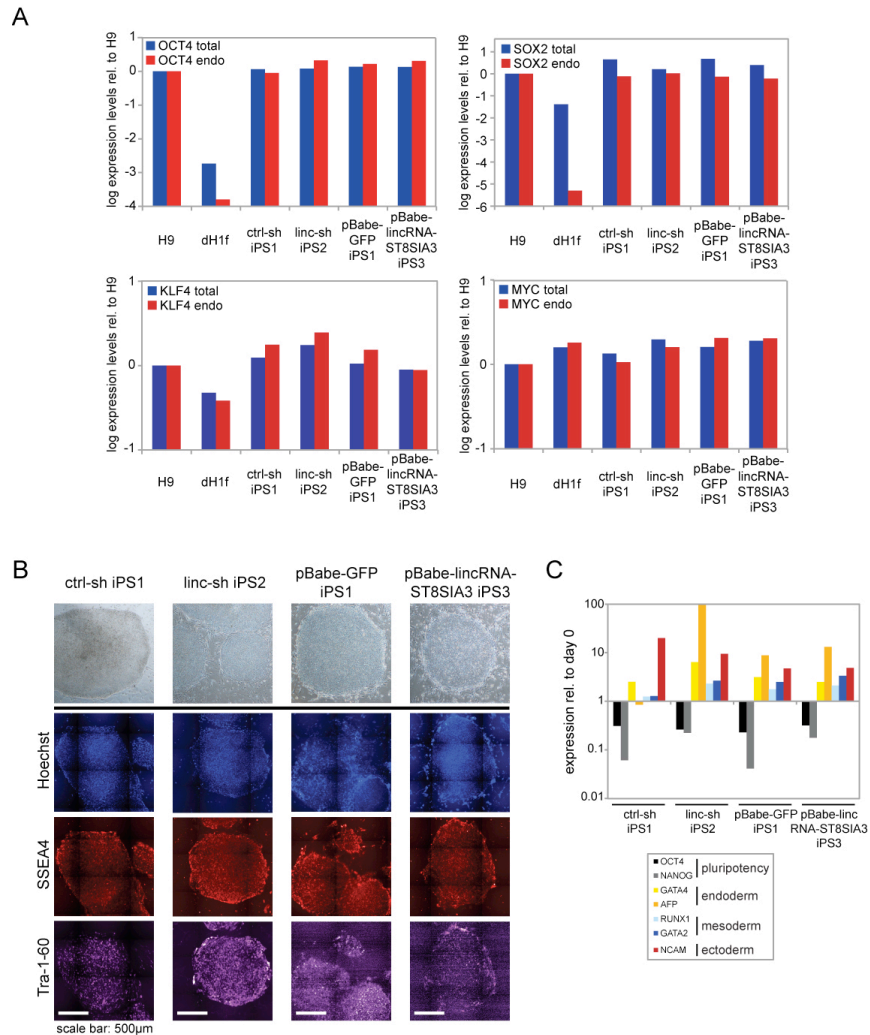

**Supplementary Figure 9:** Characterization of iPSCs derived from lincRNA-ST8SIA3 knock-down and overexpression reprogramming experiments. A) qRT-PCR to document the expression of reprogramming factor mRNAs; blue: total (transgenic and endogenous) levels of *OCT4*, *SOX2*, *KLF4*, and *MYC* mRNAs, red: endogenous levels of *OCT4*, *SOX2*, *KLF4*, and *MYC* mRNAs in H9 ESCs, dH1f fibroblasts, and fibroblast-derived iPSC lines derived from the non-targeting control-sh knock-down (ctrl-sh iPS1), the lincRNA-ST8SIA3 targeting knock-down (linc-sh iPS2), the control experiment with the GFP-expressing pBabe vector (pBabe-GFP iPS1), and the lincRNA-ST8SIA3 overexpression experiment (pBabe-lincRNA-ST8SIA3 iPS3). Expression levels are depicted relative to the levels in H9 ESCs (log scale). B) Top: Bright field images of iPSC colonies. Bottom: live-cell imaging of the same fibroblast-derived iPSC lines to document activation of the SSEA4 and Tra-1-60 cell surface markers. Hoechst 33342 was used as a DNA counter-stain. C) qRT-PCR to document downregulation of *OCT4* and *NANOG* mRNAs, as well as upregulation of differentiation markers *GATA4* and *AFP* (endoderm), *RUNX1* and *GATA2* (mesoderm), and *NCAM* (ectoderm) in day 6 EBs derived from ctrl-sh iPS1, linc-sh iPS2, pBabe-GFP iPS1, and pBabe-lincRNA-ST8SIA3 iPS3 cells. Expression values are represented relative to undifferentiated controls.

A

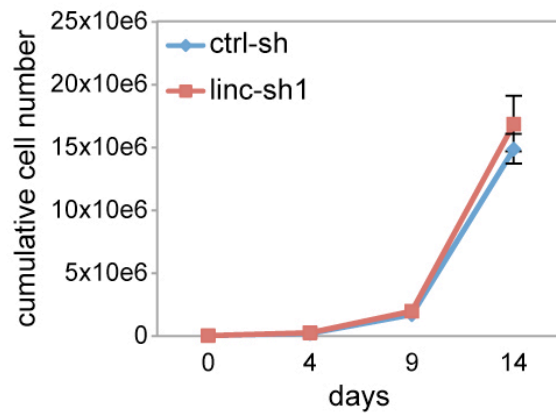

B

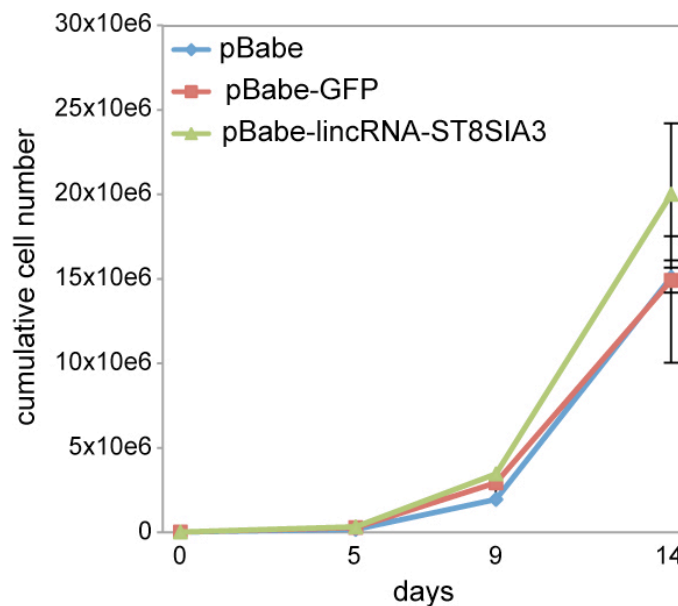

**Supplementary Figure 10:** Knock-down or overexpression of lincRNA-ST8SIA3 in dH1f fibroblasts does not affect cell growth. A) Cumulative cell numbers measured over a 14 day time-course after infection of dH1f with a non-targeting control-shRNA expressing virus (ctrl-sh) and a lincRNA-ST8SIA3 targeting virus (linc-sh1). No statistically significant difference in cell growth could be observed ( $n=4$ , error bars  $\pm$ s.e.m.;  $P=0.92$ ). B) Cumulative cell numbers measured over a 14 day time-course after infection of dH1f with empty pBabe virus, pBabe-GFP, or lincRNA-ST8SIA3 overexpression virus (pBabe-lincRNA-ST8SIA3). No statistically significant difference in cell growth could be observed ( $n=2$ , error bars  $\pm$ s.e.m.;  $P=0.79$  (compared with pBabe) and 0.81 (compared with pBabe-GFP)). Statistics were performed using Student's t-test.

A

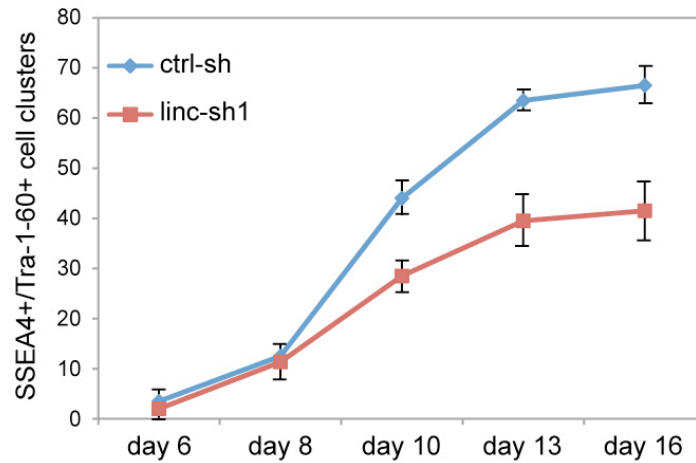

B

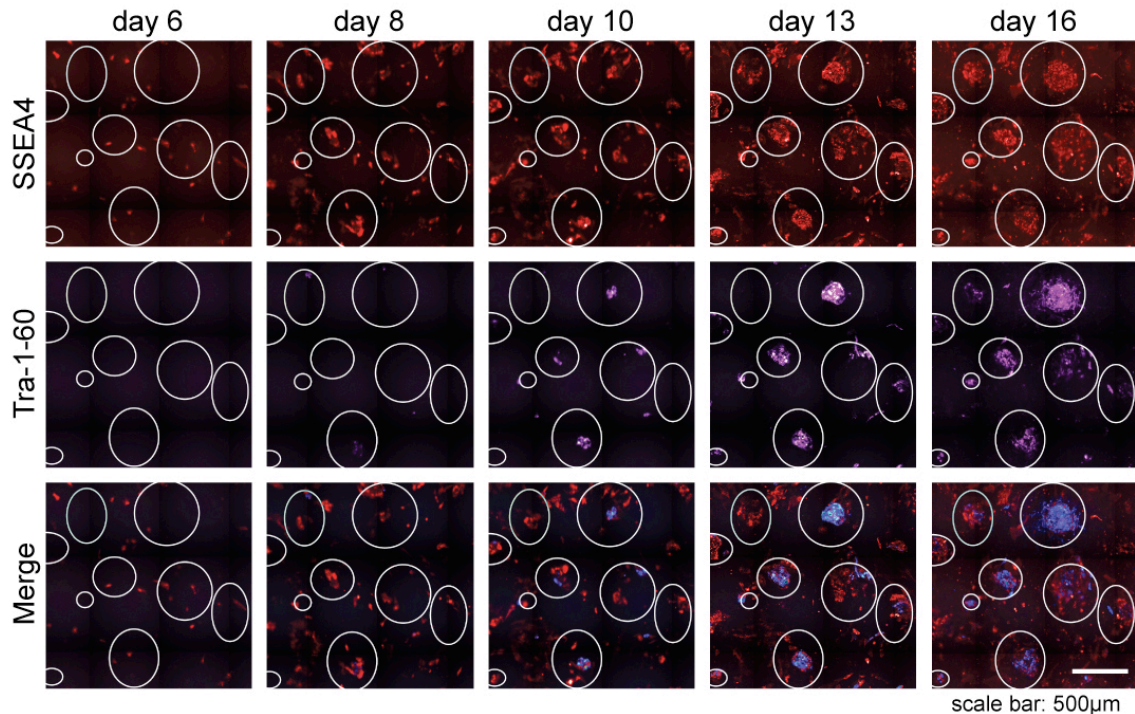

**Supplementary Figure 11:** Live-cell imaging to follow the kinetics of reprogramming. A) Quantification of SSEA4+/Tra-1-60+ cell clusters from day 6 to day 16 of reprogramming in the control (ctrl-sh) and lincRNA-ST8SIA3 knock-down (linc-sh1) sample. Four regions per 6well (each region with an area of 53.21mm<sup>2</sup>) were quantified for each control and linc-sh1, and average numbers of cell clusters per area are plotted on the y-axis. Error bars represent +/- stdv. B) Representative subregion of SSEA4 (red) and Tra1-60 (purple) stained reprogramming cells. White circles mark SSEA4+/Tra-1-60+ cell clusters identified on day 16.

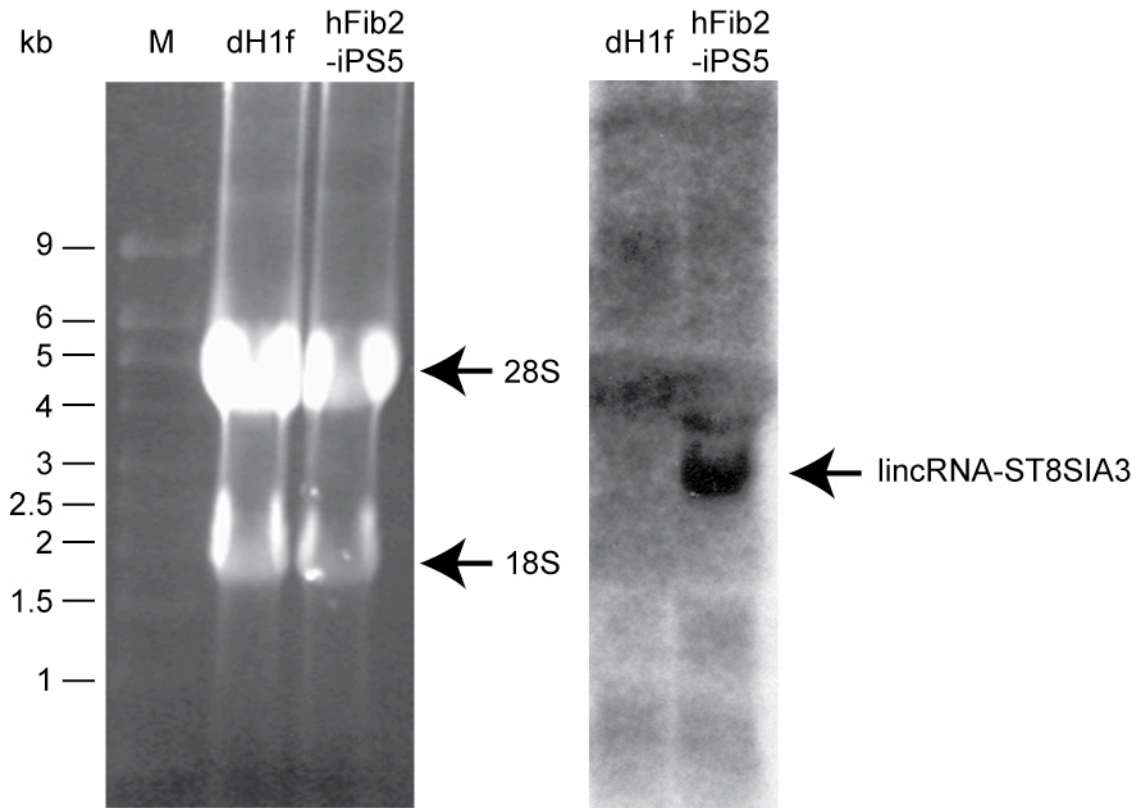

**Supplementary Figure 12:** Northern Blot of lincRNA-ST8SIA3 in dH1f and hFib2-iPS5 cells detects a 2.6kb band. Left: ethidium bromide stained agarose gel to show 28S and 18S ribosomal RNA loading controls, as well as the position of RNA marker bands. Right: Blot of lincRNA-ST8SIA3 using a specific probe (see Supplementary Methods) confirms its 2.6kb length.

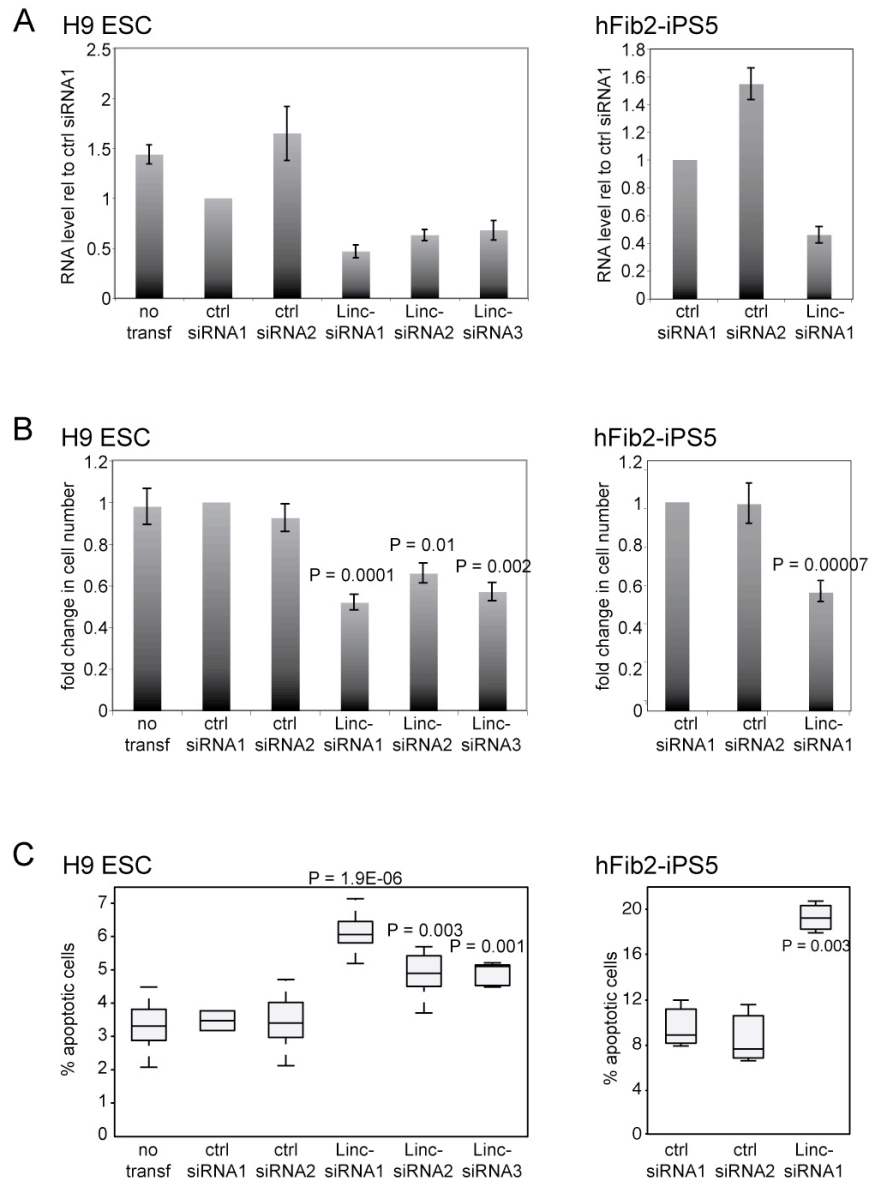

**Supplementary Figure 13:** siRNA-mediated knock-down of lincRNA-ST8SIA3 affects ESC and iPSC growth. A) qRT-PCR validation of three lincRNA-ST8SIA3-targeting siRNAs (Linc-siRNA1, -siRNA2, -siRNA3) compared with two non-targeting controls (ctrl siRNA1 and ctrl siRNA2) as well as non-transfected cells in H9 ESCs (left) and hFib2-iPS5 cells (right). RNA levels are depicted relative to the levels in cells transfected with ctrl siRNA1 ( $n \geq 3$ , error bar  $\pm$  s.e.m.). B) Cell growth of H9 ESCs (left) and hFib2-iPS5 cells (right) upon knock-down of lincRNA-ST8SIA3 compared to non-targeting controls as measured by total cell numbers 72h post-transfection. Cell numbers are depicted relative to the control (ctrl siRNA1). C) Percentage of early apoptotic cells (AnnexinV<sup>+</sup>/Propidium iodide<sup>-</sup>) measured by flow cytometry in non-transfected cells, cells transfected with non-targeting control siRNAs, and lincRNA-ST8SIA3-targeting siRNAs in H9 ESCs (left) and hFib2-iPS5 cells (right). Boxes represent the 25<sup>th</sup> to 75<sup>th</sup> percentiles of the data, the central line marks median values. Whiskers extend to the most extreme data points. Statistical analysis was performed using Student's t-test.

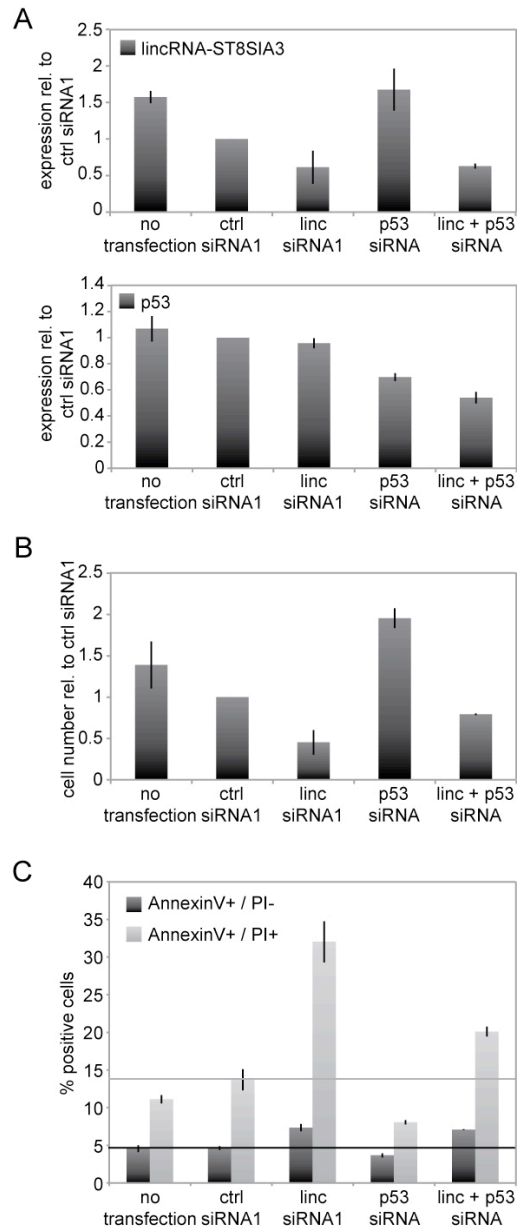

**Supplementary Figure 14:** siRNA-mediated knock-down of p53 partially rescues growth deficiency and elevated cell death of H9 cells caused by lincRNA-ST8SIA3 knock-down. A) qRT-PCR documents the efficiency of lincRNA-ST8SIA3 (top) and p53 (bottom) knock-down 72h after siRNA transfection. Expression values are depicted relative to the non-targeting control (ctrl siRNA 1); n=2, error bars +/-s.e.m. B) Relative cell numbers 72h post-transfection in non-transfected cells, or cells transfected with lincRNA-ST8SIA3 targeting siRNA (linc siRNA 1), p53-targeting siRNA (p53 siRNA), or both compared with control-transfected cells (ctrl siRNA 1); n=2, error bars +/-s.e.m. C) Flow cytometric analysis of early apoptotic (AnnexinV+/PI-) and late apoptotic/necrotic (AnnexinV+/PI+) cells 72h following knock-down of lincRNA-ST8SIA3, p53, or both, compared with the non-targeting control and untransfected cells; n=2, error bars +/-s.e.m.

## References

1. Subramanian, A. et al. Gene set enrichment analysis: a knowledge-based approach for interpreting genome-wide expression profiles. *Proc Natl Acad Sci U S A* **102**, 15545-50 (2005).
2. Assou, S. et al. A meta-analysis of human embryonic stem cells transcriptome integrated into a web-based expression atlas. *Stem Cells* **25**, 961-73 (2007).
3. Lowry, W.E. et al. Generation of human induced pluripotent stem cells from dermal fibroblasts. *Proc Natl Acad Sci U S A* **105**, 2883-8 (2008).



## **Supplementary Table 1: Differentially expressed lincRNAs**

### **A) ES-fibroIPS-fibro\_comparison**

#### **lincRNAs upregulated in ES and fibro-iPS lincRNAs upregulated in fibroblasts**

|                          |                           |
|--------------------------|---------------------------|
| chr3:13068175-13122525   | chr3:37839075-37851625    |
| chr3:37389200-37409700   | chr3:37861975-37876925    |
| chr3:88191225-88208250   | chr3:44017175-44136825    |
| chr3:88209750-88229200   | chr3:108032575-108046850  |
| chr3:88233150-88258600   | chr3:108443925-108458725  |
| chr3:188363175-188375850 | chr3:139242175-139254800  |
| chr7:22570350-22689975   | chr3:157938400-157953775  |
| chr7:25945000-25956500   | chr3:157960475-158021825  |
| chr7:108969225-109059825 | chr3:158438000-158454000  |
| chr7:124660350-124687075 | chr3:196904200-196928625  |
| chr7:125351475-125521800 | chr7:22860450-22876975    |
| chr7:129188850-129205475 | chr7:30552675-30585400    |
| chr18:14065250-14092850  | chr7:32920750-32945850    |
| chr18:31720150-31782325  | chr7:78921550-78942375    |
| chr18:35328475-35629325  | chr7:86800800-86810825    |
| chr18:35592575-35629325  | chr7:104403400-104440275  |
| chr18:52872300-52882675  | chr7:126777625-126793150  |
| chr2:7918700-7954175     | chr7:130178825-130451400  |
| chr2:64323075-64376900   | chr7:130380300-130441050  |
| chr2:77174650-77185275   | chr18:57387175-57433350   |
| chr2:85039975-85050950   | chr18:69451350-69507600   |
| chr2:134596475-134694600 | chr18:70409300-70433425   |
| chr2:168111225-168123050 | chr18:72307325-72331925   |
| chr2:179511550-179537625 | chr2:19395750-19410525    |
| chr2:224209950-224295925 | chr2:20646700-20658800    |
| chr20:36470500-36515575  | chr2:111676650-111726950  |
| chr20:56824850-56837175  | chr2:165217375-165227650  |
| chr14:20977125-20993325  | chr2:177854175-177868000  |
| chr14:40499950-40517950  | chr2:177854175-177922425  |
| chr14:47751025-47794125  | chr2:192264725-192277000  |
| chr14:80937850-80948425  | chr2:216182125-216421975  |
| chr14:99267075-99297500  | chr2:216373475-216392050  |
| chr17:13902350-13912750  | chr2:218542550-218575300  |
| chr1:65291650-65304400   | chr17:21373950-21390575   |
| chr1:73203475-73218700   | chr17:67895375-68098675   |
| chr1:79669875-79726875   | chr14:58952300-58981800   |
| chr1:113301525-113321425 | chr14:68342850-68361800   |
| chr1:173389275-173428400 | chr14:100364750-100405275 |
| chr1:203671525-203684250 | chr1:33624900-33640125    |
| chr1:236698300-236712250 | chr1:39776600-39792825    |
| chr6:14814750-14856150   | chr1:85705400-85746650    |
| chr6:15090200-15126275   | chr1:85752775-85814125    |
| chr6:21775750-21969750   | chr1:98211850-98239375    |
| chr6:21775750-22268800   | chr1:98211850-98471750    |

chr6:21991500-22268800  
chr6:22082150-22268675  
chr6:22216575-22268800  
chr6:40412925-40431825  
chr6:48152775-48178175  
chr6:94572500-94596150  
chr6:95307575-95320325  
chr6:114829475-114849375  
chr6:114868875-114889350  
chr6:131665600-131715450  
chr6:138942775-138992000  
chr6:139002750-139061900  
chr6:167309700-167331675  
chr21:39892800-39905250  
chr10:6819700-6929500  
chr5:1597500-1620100  
chr5:12679825-12772900  
chr5:25421700-25481600  
chr5:94014600-94029225  
chr5:115659375-115672450  
chr5:133864950-133875950  
chr5:141647375-141657575  
chr16:25178750-25189800  
chr13:39913400-39927450  
chr13:42303950-42340125  
chr13:47348925-47379300  
chr13:53572000-53599550  
chr13:53710800-53826900  
chr13:55006675-55050350  
chr13:55133475-55166650  
chr13:90799275-90818300  
chr22:26399650-26467825  
chr22:30445350-30475775  
chr9:2197775-2288675  
chr9:2746150-2763400  
chr9:2768700-2781525  
chr9:23587325-23674450  
chr9:36392125-36402600  
chr9:36409075-36421725  
chr9:117628000-117640825  
chr15:22809575-22841625  
chr15:22809575-22919700  
chr15:48435425-48449025  
chr15:49996975-50010800  
chr15:79937400-79947500  
chr11:27179825-27196825  
chr11:70203250-70246225  
chr11:70284600-70344900  
chr11:70352250-70396875

chr1:176252425-176271000  
chr1:197068975-197174200  
chr1:197078625-197099525  
chr1:197155700-197171450  
chr1:199858800-199883250  
chr1:206037850-206063200  
chr1:206037900-206108750  
chr1:212579525-212590200  
chr6:3842475-3856750  
chr6:56831150-56842350  
chr6:72090100-72115900  
chr6:72128125-72186300  
chr6:129882650-129921300  
chr6:147269500-147279725  
chr10:29739925-29758500  
chr10:46514400-46569425  
chr10:90729225-90740200  
chr10:119231725-119242550  
chr10:119256775-119270300  
chr5:38858825-38880150  
chr5:92788525-92800450  
chr5:92890475-92942875  
chr5:127320775-127407375  
chr5:127413650-127433475  
chr5:148767275-148793000  
chr5:150289375-150308950  
chr16:53502500-53517100  
chr16:85065700-85086425  
chr13:32786375-32821550  
chr13:49455650-49466250  
chr13:49555700-49595650  
chr13:100021050-100034425  
chr9:21481050-21587675  
chr9:131287475-131307550  
chr11:64946775-64971250  
chr11:86297350-86316725  
chr11:121430825-121455075  
chr11:121514300-121572575  
chr11:121570800-121586150  
chr11:130235450-130250500  
chr4:6715000-6734650  
chr4:24423850-24436150  
chr4:68258750-68278525  
chr4:103556475-103569975  
chr19:32954225-32988950  
chr8:37377750-37470000  
chr8:49497300-49508350  
chr8:66664400-66675375  
chr8:92141050-92151400

chr11:70569675-70613500  
chr11:127925850-127944925  
chr4:235050-250725  
chr4:15266300-15304725  
chr4:21970900-21980925  
chr4:24126625-24137100  
chr4:53272125-53310900  
chr4:76821825-76843850  
chr4:76853725-76868150  
chr4:93394800-93411650  
chr4:126688600-126702025  
chr19:21811825-21825825  
chr19:52838475-52873175  
chr8:6541450-6552025  
chr8:28599675-28613975  
chr8:128891450-128984025  
chr8:128960975-128988150  
chr8:129045250-129104075  
chr8:129111400-129188100  
chr8:133140825-133161650  
chr8:135860125-135912450  
chr8:138457025-138490825  
chr12:32489000-32538825  
chr12:45330500-45384750  
chr12:83580475-83606175  
chr12:96400875-96429925  
chr12:96435000-96447575  
chrX:45482950-45595350  
chrX:93707725-93720300  
chrX:93707725-93920325  
chrX:97715650-98022175  
chrX:112866825-112877250  
chrX:112909500-112923700  
chrX:112927350-112984650  
chrX:112927350-113120025  
chrX:114919750-114943350  
chrX:114965050-114983975  
chrX:130653175-130673725  
chrX:130702275-130791225  
chrX:135771475-135783050

chr8:102256850-102268925  
chr8:107124300-107141200  
chr8:118825700-118840650  
chr12:45059775-45094150  
chr12:45112400-45261050  
chr12:52809275-52845625  
chr12:64452900-64492900  
chr12:104249300-104299050  
chr12:104250700-104514975  
chrX:45482950-45595350  
chrX:62560050-62574175

## **B) ES-CD34iPS-CD34\_comparison**

### **lincRNAs upregulated in ES and CD34-iPS    lincRNAs upregulated in CD34+ cells**

|                          |                           |
|--------------------------|---------------------------|
| chr3:13068175-13122525   | chr3:157960475-158021825  |
| chr3:88233150-88258600   | chr3:172974575-173014100  |
| chr3:157960475-158021825 | chr3:195671625-195688075  |
| chr3:188363175-188375850 | chr7:30552675-30585400    |
| chr7:22570350-22689975   | chr7:126777625-126793150  |
| chr7:105333950-105351950 | chr18:72307325-72331925   |
| chr7:124660350-124687075 | chr2:74047225-74063900    |
| chr18:31270875-31282100  | chr2:111676650-111726950  |
| chr18:31720150-31782325  | chr20:30614850-30628550   |
| chr18:52872300-52882675  | chr20:36470500-36515575   |
| chr2:47401150-47414050   | chr17:7716675-7728025     |
| chr2:64323075-64376900   | chr17:21373950-21390575   |
| chr2:77174650-77185275   | chr14:80937850-80948425   |
| chr2:85039975-85050950   | chr14:80950175-80970975   |
| chr2:152335500-152361525 | chr6:6628525-6646600      |
| chr2:179511550-179537625 | chr6:29809950-29822800    |
| chr2:216182125-216421975 | chr6:167309700-167331675  |
| chr2:216373475-216392050 | chr1:23477400-23492375    |
| chr20:56824850-56837175  | chr1:39776600-39792825    |
| chr17:39456275-39467525  | chr1:206037850-206063200  |
| chr17:67895375-68098675  | chr1:206037900-206108750  |
| chr14:47751025-47794125  | chr21:2585665-25874075    |
| chr14:70858200-70993750  | chr21:2668020-26712875    |
| chr14:99267075-99297500  | chr21:2785925-27869625    |
| chr1:9129450-9164075     | chr21:2892745-28941150    |
| chr1:65291650-65304400   | chr21:2901957-29035625    |
| chr1:172235150-172257650 | chr21:2947217-29486175    |
| chr1:173389275-173428400 | chr21:2948882-29522825    |
| chr1:203671525-203684250 | chr21:2968805-29711875    |
| chr1:203936725-203948900 | chr21:2971672-29731300    |
| chr1:212579525-212590200 | chr21:2974940-29813925    |
| chr1:245184075-245194450 | chr21:3537187-35411225    |
| chr6:14814750-14856150   | chr10:120025775-120037250 |
| chr6:30364275-30401550   | chr5:43102225-43120425    |
| chr6:40412925-40431825   | chr5:77321525-77331525    |
| chr6:44149375-44170550   | chr16:3113750-3124850     |
| chr6:48152775-48178175   | chr13:49505400-49519275   |
| chr6:86438525-86452775   | chr13:49555700-49595650   |
| chr6:94572500-94596150   | chr11:72124275-72140250   |
| chr6:114829475-114849375 | chr4:53272125-53310900    |
| chr6:139002750-139061900 | chr19:32954225-32988950   |
| chr21:39892800-39905250  | chr19:41757025-41772825   |
| chr10:6819700-6929500    | chr8:125541150-125555450  |
| chr10:29739925-29758500  | chr8:129111400-129188100  |
| chr10:46514400-46569425  | chr12:131170325-131183625 |
| chr10:64906075-64942725  | chrX:62560050-62574175    |
| chr10:79193175-79209400  | chrX:112927350-113120025  |

chr10:118576375-118598450  
chr10:119231725-119242550  
chr5:12679825-12772900  
chr5:25421700-25481600  
chr5:74363725-74384025  
chr5:173065450-173083600  
chr16:53502500-53517100  
chr13:39913400-39927450  
chr13:42303950-42340125  
chr13:47348925-47379300  
chr13:53572000-53599550  
chr13:53710800-53826900  
chr13:55006675-55050350  
chr13:90799275-90818300  
chr22:29695900-29706450  
chr9:2197775-2288675  
chr9:2746150-2763400  
chr9:21481050-21587675  
chr9:23587325-23674450  
chr9:36392125-36402600  
chr11:27179825-27196825  
chr11:70203250-70246225  
chr11:70284600-70344900  
chr11:70569675-70613500  
chr11:86297350-86316725  
chr11:121514300-121572575  
chr11:127925850-127944925  
chr11:130235450-130250500  
chr15:22809575-22841625  
chr15:22809575-22919700  
chr15:49996975-50010800  
chr15:79937400-79947500  
chr4:235050-250725  
chr4:15266300-15304725  
chr4:15848275-15885050  
chr4:21970900-21980925  
chr4:53272125-53310900  
chr4:93394800-93411650  
chr19:52838475-52873175  
chr8:37377750-37470000  
chr8:90795725-90810750  
chr8:115369100-115387225  
chr8:133140825-133161650  
chr8:135860125-135912450  
chr8:138457025-138490825  
chr12:45330500-45384750  
chr12:64277400-64357675  
chr12:74301700-74547775  
chr12:78463525-78491000

chrX:45482950-45595350  
chrX:57018625-57030000  
chrX:73336425-73429775  
chrX:93707725-93920325  
chrX:102886975-102898350  
chrX:112927350-113120025  
chrX:114965050-114983975  
chrX:130653175-130673725  
chrX:130702275-130791225

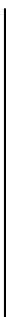

### C) ES-fibroIPS\_comparison

| <b>lincRNAs upregulated in fibro-iPS</b> | <b>lincRNAs upregulated in ES</b> |
|------------------------------------------|-----------------------------------|
|------------------------------------------|-----------------------------------|

|                           |                          |
|---------------------------|--------------------------|
| chr7:22570350-22689975    | chr3:37389200-37409700   |
| chr7:124660350-124687075  | chr3:196904200-196928625 |
| chr7:130178825-130451400  | chr18:46799075-46810100  |
| chr7:130380300-130441050  | chr2:134596475-134694600 |
| chr18:52872300-52882675   | chr2:177854175-177922425 |
| chr2:179511550-179537625  | chr1:113301525-113321425 |
| chr17:39456275-39467525   | chr1:154326000-154341900 |
| chr14:100364750-100405275 | chr1:191490425-191504575 |
| chr14:100459225-100603275 | chr6:21775750-21969750   |
| chr6:48152775-48178175    | chr6:21775750-22268800   |
| chr6:94572500-94596150    | chr6:21991500-22268800   |
| chr6:95307575-95320325    | chr6:22082150-22268675   |
| chr1:39776600-39792825    | chr6:22216575-22268800   |
| chr1:79669875-79726875    | chr6:80305150-80328275   |
| chr1:85705400-85746650    | chr6:114868875-114889350 |
| chr10:6819700-6929500     | chr6:155200400-155227200 |
| chr13:42303950-42340125   | chr21:2585665-25874075   |
| chr13:53710800-53826900   | chr21:2668020-26712875   |
| chr22:23738700-23794025   | chr21:2785925-27869625   |
| chr9:2197775-2288675      | chr21:2892745-28941150   |
| chr9:117628000-117640825  | chr21:2901957-29035625   |
| chr15:22809575-22919700   | chr21:2947217-29486175   |
| chr4:53272125-53310900    | chr21:2948882-29522825   |
| chr4:93394800-93411650    | chr21:2968805-29711875   |
| chr12:64277400-64357675   | chr21:2971672-29731300   |
| chrX:45482950-45595350    | chr21:2974940-29813925   |
| chrX:112927350-113120025  | chr21:3537187-35411225   |
| chrX:115315750-115327875  | chr5:87601475-87624775   |
|                           | chr5:94014600-94029225   |
|                           | chr5:102119525-102221625 |
|                           | chr5:115659375-115672450 |
|                           | chr5:127413650-127433475 |
|                           | chr5:147366150-147380650 |
|                           | chr16:25178750-25189800  |
|                           | chr13:44814075-44848225  |
|                           | chr13:53710800-53826900  |
|                           | chr22:16799450-16847225  |
|                           | chr22:23738700-23794025  |
|                           | chr11:27179825-27196825  |
|                           | chr11:64946775-64971250  |
|                           | chr11:86297350-86316725  |
|                           | chr15:22809575-22841625  |
|                           | chr15:22809575-22919700  |
|                           | chr15:48435425-48449025  |
|                           | chr15:49996975-50010800  |
|                           | chr15:86833575-86843600  |
|                           | chr4:15848275-15885050   |

chr19:52805475-52829200  
chr8:6541450-6552025  
chr8:28599675-28613975  
chr8:52950675-52973175  
chr8:102256850-102268925  
chr8:124541550-124568875  
chr8:128891450-128984025  
chr12:64452900-64492900  
chr12:131170325-131183625  
chrX:73081400-73149600  
chrX:93707725-93920325  
chrX:112927350-112984650  
chrX:112927350-113120025



## D) ES-CD34iPS\_comparison

### **lincRNAs upregulated in CD34-iPS**

chr3:88191225-88208250  
chr3:172974575-173014100  
chr3:188363175-188375850  
chr7:22570350-22689975  
chr7:30552675-30585400  
chr7:64088850-64099775  
chr7:124660350-124687075  
chr18:35328475-35629325  
chr18:35592575-35629325  
chr18:52872300-52882675  
chr2:47401150-47414050  
chr2:217089600-217121725  
chr14:99267075-99297500  
chr17:21373950-21390575  
chr17:39456275-39467525  
chr6:94572500-94596150  
chr1:79669875-79726875  
chr1:173389275-173428400  
chr21:2585665-25874075  
chr21:2668020-26712875  
chr21:2785925-27869625  
chr21:2892745-28941150  
chr21:2901957-29035625  
chr21:2947217-29486175  
chr21:2948882-29522825  
chr21:2968805-29711875  
chr21:2971672-29731300  
chr21:2974940-29813925  
chr21:3537187-35411225  
chr10:6819700-6929500  
chr10:46514400-46569425  
chr10:79193175-79209400  
chr10:119231725-119242550  
chr16:53502500-53517100  
chr13:51388950-51400950  
chr13:53572000-53599550  
chr13:53710800-53826900  
chr22:29695900-29706450  
chr11:70284600-70344900  
chr11:70569675-70613500  
chr11:86297350-86316725  
chr9:2197775-2288675  
chr9:21481050-21587675  
chr19:41757025-41772825  
chr8:37377750-37470000  
chr8:135860125-135912450  
chr8:138457025-138490825

### **lincRNAs upregulated in ES**

chr3:88233150-88258600  
chr3:157960475-158021825  
chr7:30552675-30585400  
chr7:86800800-86810825  
chr7:104403400-104440275  
chr7:105333950-105351950  
chr7:126777625-126793150  
chr7:129188850-129205475  
chr7:130178825-130451400  
chr18:70409300-70433425  
chr18:72307325-72331925  
chr2:7918700-7954175  
chr2:70121450-70165275  
chr2:77174650-77185275  
chr2:85039975-85050950  
chr2:111676650-111726950  
chr2:138962200-138974800  
chr2:152335500-152361525  
chr2:177854175-177922425  
chr2:224209950-224295925  
chr20:36470500-36515575  
chr20:56824850-56837175  
chr14:20977125-20993325  
chr14:47751025-47794125  
chr14:57814000-57830600  
chr14:100425525-100457175  
chr6:3944675-3963450  
chr6:30364275-30401550  
chr6:44149375-44170550  
chr6:74040350-74054750  
chr6:114829475-114849375  
chr6:139002750-139061900  
chr6:167309700-167331675  
chr1:41728875-41743675  
chr1:203936725-203948900  
chr1:206037850-206063200  
chr1:206037900-206108750  
chr1:212579525-212590200  
chr21:3537187-35411225  
chr21:39892800-39905250  
chr10:6663500-6677950  
chr10:64906075-64942725  
chr10:118576375-118598450  
chr5:12679825-12772900  
chr5:25421700-25481600  
chr5:43102225-43120425  
chr16:3113750-3124850

chrX:45482950-45595350  
chrX:57018625-57030000  
chrX:93707725-93920325  
chrX:102886975-102898350  
chrX:114919750-114943350

chr16:72904500-72918375  
chr13:39913400-39927450  
chr13:47348925-47379300  
chr22:16799450-16847225  
chr22:30445350-30475775  
chr15:22809575-22841625  
chr15:22809575-22919700  
chr15:49996975-50010800  
chr15:79937400-79947500  
chr11:70284600-70344900  
chr11:70569675-70613500  
chr11:121514300-121572575  
chr9:23587325-23674450  
chr4:15266300-15304725  
chr4:53272125-53310900  
chr4:76853725-76868150  
chr4:103556475-103569975  
chr4:120611850-120623600  
chr19:52838475-52873175  
chr8:6541450-6552025  
chr8:90684400-90697825  
chr8:135860125-135912450  
chr12:64277400-64357675  
chrX:62560050-62574175  
chrX:73336425-73429775  
chrX:112927350-113120025  
chrX:115315750-115327875  
chrX:130702275-130791225

## **E) iPSC-enriched lincRNAs that overlap between fibro-iPS and CD34-iPS**

chr10:6819700-6929500

chr7:22570350-22689975

chr7:124660350-124687075

chr18:52872300-52882675

chr13:53710800-53826900

chr9:2197775-2288675

chr17:39456275-39467525

chr1:79669875-79726875

chr6:94572500-94596150

chrX:45482950-45595350

## **Supplementary Table 2: Reprogramming experiments - iPSC colony counts**

### **LincRNA-ST8SIA3 knock-down**

|          | Experiment 1 | Experiment 2 | Experiment 3 | Experiment 4 |
|----------|--------------|--------------|--------------|--------------|
| ctrl-sh  | 27           | 28           | 14           | 168          |
| linc-sh1 | 3            | 7            | 0            | 29           |
| linc-sh2 | 11           | 19           | 3            | 116          |

### **LincRNA-ST8SIA3 overexpression**

|           | Experiment 1 | Experiment 2 | Experiment 3 | Experiment 4 | Experiment 5 |
|-----------|--------------|--------------|--------------|--------------|--------------|
| pBabe     | 98           | 85           | 168          | 26           | 14           |
| pBabe-GFP | 61           | 55           | 123          | 26           | 15           |
| pBabe-L18 | 219          | 202          | 190          | 83           | 40           |

### Supplementary Table 3

#### Genes deregulated upon lincRNA-ST8SIA3 knock-down

##### A) Differentially expressed genes

| Genes up in knock-down | Genes down in knock-down |
|------------------------|--------------------------|
| AACSL                  | ATP10D                   |
| ABCA1                  | C13orf18                 |
| ABCB7                  | chd7                     |
| Abi1                   | Chst9                    |
| Acox2                  | CUZD1                    |
| Acpl2                  | Dsel                     |
| Actg2                  | EXPH5                    |
| actn3                  | FAM126A                  |
| AIG1                   | FAR2                     |
| akap2                  | FRZB                     |
| akap8l                 | Gli3                     |
| Akna                   | gtf2a1l                  |
| ALG13                  | gxylt2                   |
| alkbh6                 | IFIH1                    |
| ALS2                   | LOC100128626             |
| ANAPC13                | Lpl                      |
| ANAPC16                | MET                      |
| ANTXR1                 | MGAT4A                   |
| ARHGAP27               | MYRIP                    |
| armc8                  | Npy1r                    |
| arrdc3                 | PANX1                    |
| asap1                  | PECI                     |
| Atp1a2                 | PLOD2                    |
| Atpaf1                 | PPP1R2P4                 |
| b4galt2                | RAP2A                    |
| bbs7                   | Serpinb3                 |
| BEX2                   | serpinb4                 |
| BLOC1S3                | Sfrp1                    |
| bmp7                   | snx7                     |
| C12orf60               | SOX11                    |
| C13orf1                | SPIRE1                   |
| c14orf1                | STAU2                    |
| C14orf118              | stc1                     |
| C17orf56               | STON1                    |
| C17orf68               | STON1-GTF2A1L            |
| C19orf12               | TIFA                     |
| C1orf226               | TMEM106C                 |
| C2orf56                | Tmem178                  |
| C2orf56                | UBE2J1                   |
| C2orf74                | UGT3A1                   |
| C2orf88                | UGT8                     |
| c3orf64                | ZNF664                   |
| C4orf38                |                          |

C5orf28  
C5orf41  
C6orf35  
C7orf57  
c8orf40  
cabcl  
CACNA2D2  
CALD1  
CAMK2D  
CARS2  
CASP8  
CBFA2T2  
cbr4  
CBWD2  
cbx4  
CCDC50  
CDH11  
CECR1  
Cel  
CH25H  
CLDN20  
CNN1  
CNOT6  
Col16a1  
COL1A2  
cpt2  
CREB5  
cxorf38  
CYP1B1  
CYP3A5  
DAAM1  
DBT  
dcaf7  
DDX25  
DDX3Y  
DKFZP586B0319  
Dnajc16  
Dnajc21  
dnal1  
Dnase1l1  
DNMT3A  
Dock5  
DPEP3  
EEF1A1  
EEF1A1P24  
EEF1A1P5  
EEF1A1P9  
EFNA5  
Eif5a2

ELAVL1  
eml4  
Enpp1  
Enpp5  
EPHA7  
EPPK1  
ERRFI1  
Esyt2  
ESYT3  
ETV5  
EXOC3L  
EXOC6B  
FAM110B  
Fam116a  
FAM200B  
fam20a  
Fam71f1  
fam73a  
FASTKD2  
Fbxl20  
fbxo27  
fdxr  
FLJ25613  
flvcr1  
FNBP4  
Fntb  
FSD1L  
Galnt6  
Gatad2b  
GLS  
gltP  
GLTPP1  
Gnpnat1  
Golim4  
GPCPD1  
Gpld1  
Gpr143  
GREM1  
gstk1  
Hdac8  
HECW1  
herc4  
Hist1h2ab  
Hist1h2ad  
Hist1h2ae  
HIST1H2BK  
HIST1H3A  
HIST1H3B  
HIST1H3C

HIST1H3D  
HIST1H3E  
HIST1H3F  
hist1h3g  
HIST1H3H  
Hist1h3i  
HIST1H3J  
HIST2H3A  
hist2h3c  
HIST2H3D  
hnrpII  
HS6ST2  
HSD17B12  
hsd17b14  
Hsp90b1  
ID2  
ids  
Insm1  
IPO7  
Ipw  
irak1bp1  
isyna1  
itga6  
Jph4  
Jun  
KCNK12  
KCTD1  
KIAA0232  
KIAA1217  
KIF5C  
Klf4  
klf6  
KLHDC5  
LGALS1  
LMCD1  
Imna  
Lnx1  
LOC100129240  
LOC100132111  
LOC100133398  
LOC100133772  
LOC100271832  
LOC151878  
LOC283174  
LOC285401  
LOC286467  
LOC401317  
LOC440434  
LOC642031



LOC642587  
LOC645100  
LOC647859  
LOC729143  
Lrrn4  
Lyplal1  
MAGI2  
MALAT1  
MAPK1  
Mbn1  
MCART1  
mcl1  
Med13l  
MED17  
MEGF6  
MFF  
MGC16121  
MGC9913  
MID1  
MIDN  
Mir21  
MPHOSPH9  
Mrip  
mrps11  
Mtmr9  
mxra7  
Myo10  
MYO1E  
myoz2  
NAP1L1  
NAV2  
NCRNA00081  
Ncrna00086  
NCRNA00087  
NCRNA00230B  
nfatc1  
NFYB  
ngly1  
NLN  
NOX1  
npepps  
NPY  
nr2c1  
Nup214  
Ocln  
Osbp16  
OSBPL7  
OSGIN2  
P2RY14

PABPC1L  
PALM2  
PALM2-AKAP2  
PAPPA  
PAPPAS  
Pcdh19  
PCLO  
pcm1  
Pde4b  
PDE4D  
PIAS2  
PICALM  
PIP5K1A  
pitpna  
PKMYT1  
PLBD2  
POLR3C  
POMP  
POU2F3  
PPM1A  
PRODH  
Prr24  
pten  
PTENP1  
Ptpn23  
rab21  
RABGGTB  
Ran  
Ranbp2  
Rasgrp2  
Rbm46  
REV3L  
RFK  
Rhebl1  
RNY1  
RNY3  
RNY4  
RNY4P19  
RNY4P7  
RNY5P10  
RPL37A  
Rps6kl1  
Scai  
SCFD2  
SCG5  
Scyl3  
SEC22B  
Sec61a2  
selt

Sema4a  
SEMA6A  
sf3b1  
sfrs18  
SGK223  
SGSM3  
Sh3kbp1  
SLC11A2  
SLC16A5  
SLC16A9  
SLC19A2  
slc25a16  
SLC2A3  
SLC2A4RG  
SLC35A3  
SLC38A7  
SLMAP  
SMAD3  
smek2  
SMYD2  
SNORD113-1  
SNORD113-2  
SNORD113-3  
SNORD113-4  
SNORD113-5  
SNORD113-6  
SNORD113-7  
SNORD113-8  
SNORD113-9  
SNORD114-1  
SNORD114-10  
SNORD114-11  
SNORD114-12  
SNORD114-13  
SNORD114-14  
SNORD114-15  
SNORD114-16  
SNORD114-17  
SNORD114-18  
SNORD114-19  
SNORD114-2  
SNORD114-20  
SNORD114-21  
SNORD114-22  
SNORD114-23  
SNORD114-24  
SNORD114-25  
SNORD114-26  
SNORD114-27

SNORD114-28  
SNORD114-29  
SNORD114-3  
SNORD114-30  
SNORD114-31  
SNORD114-4  
SNORD114-5  
SNORD114-6  
SNORD114-7  
SNORD114-8  
SNORD114-9  
SNRPN  
sntb2  
SNURF  
Snx30  
Socs4  
SORBS1  
SPOPL  
spred1  
SPTBN1  
sqstm1  
SRI  
ssu72  
ST6GAL2  
STK11  
STX17  
SULT1A3  
SULT1A4  
Syt11  
SYTL2  
TCEA1  
TCEA1P2  
Tceal7  
Tcf7l2  
TCIRG1  
TCTN3  
Tecpr1  
TFAP2C  
tgfbr1  
Tmem43  
TNC  
TNFAIP8  
TNFAIP8  
TNRC18B  
TNS1  
Tpcn2  
trim2  
TRIO  
TTC28

ube2b  
UBR1  
UBR3  
Uevld  
USP22  
USP4  
usp53  
Utf1  
VGF  
vil1  
vps37b  
Vps41  
Wdhd1  
WDR35  
Wif1  
ZBTB10  
ZFP36  
znf277  
ZNF658  
ZNF682  
ZNF83

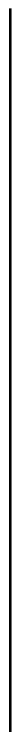

## B) Gene Set Enrichment Analysis

### Gene Sets enriched in lincRNA-ST8SIA3 knock-down

| <i>NAME</i>                                | <i>SIZE</i> | <i>ES</i>  | <i>NES</i> | <i>NOM p-val</i> | <i>FDR q-val</i> | <i>FWER p-val</i> | <i>RANK AT MAX LEADING EDGE</i>     |
|--------------------------------------------|-------------|------------|------------|------------------|------------------|-------------------|-------------------------------------|
| KANNAN_P53_UP                              | 36          | 0.6855854  | 2.2099452  | 0                | 0                | 0                 | 3587 tags=50%, list=18%, signal=61% |
| OXSTRESS_BREASTCA_UP                       | 28          | 0.68489933 | 2.0290132  | 0                | 0.02775887       | 0.05              | 2147 tags=43%, list=11%, signal=48% |
| HDACI_COLON_TSA2HRS_UP                     | 60          | 0.53059876 | 1.9356368  | 0                | 0.04733173       | 0.17              | 5199 tags=47%, list=26%, signal=63% |
| HDACI_COLON_SUL12HRS_UP                    | 26          | 0.6856895  | 1.9478719  | 0                | 0.05199197       | 0.14              | 2453 tags=27%, list=12%, signal=31% |
| CORDERO_KRAS_KD_VS_CONTROL_UP              | 75          | 0.5086824  | 1.908135   | 0                | 0.06252702       | 0.26              | 4048 tags=45%, list=20%, signal=57% |
| UVB_NHEK3_C3                               | 17          | 0.6352384  | 1.8264904  | 0                | 0.11714856       | 0.58              | 2078 tags=24%, list=10%, signal=26% |
| HDACI_COLON_SUL16HRS_UP                    | 42          | 0.554931   | 1.842247   | 0                | 0.11921456       | 0.47              | 1637 tags=14%, list=8%, signal=16%  |
| HDACI_COLON_CURSUL_UP                      | 42          | 0.5412102  | 1.831326   | 0                | 0.11951414       | 0.56              | 2453 tags=21%, list=12%, signal=24% |
| CROONQUIST_IL6_STROMA_UP                   | 39          | 0.5643391  | 1.7390693  | 0                | 0.17592216       | 0.9               | 1433 tags=26%, list=7%, signal=28%  |
| HSA00051_FRUCTOSE_AND_MANNANOSE_METABOLISM | 42          | 0.51609683 | 1.7583388  | 0                | 0.17687044       | 0.87              | 6230 tags=48%, list=31%, signal=69% |
| GAMMA_ESR_WS_UNREG                         | 29          | 0.5693539  | 1.7417186  | 0                | 0.1829188        | 0.9               | 2533 tags=28%, list=13%, signal=32% |
| HDACI_COLON_CUR12HRS_UP                    | 21          | 0.61049736 | 1.7476523  | 0.01724138       | 0.18395676       | 0.89              | 2453 tags=24%, list=12%, signal=27% |
| HDACI_COLON_BUT24HRS_UP                    | 70          | 0.50772095 | 1.7792326  | 0                | 0.1861808        | 0.75              | 5004 tags=46%, list=25%, signal=61% |
| 4NQO_ESR_WS_UNREG                          | 36          | 0.5860095  | 1.770935   | 0.01694915       | 0.19109344       | 0.83              | 2393 tags=28%, list=12%, signal=31% |
| MTA3PATHWAY                                | 15          | 0.6518004  | 1.7129923  | 0                | 0.19236505       | 0.96              | 1983 tags=27%, list=10%, signal=30% |
| HSA04115_P53_SIGNALING_PATHWAY             | 68          | 0.48712826 | 1.7583611  | 0                | 0.19294956       | 0.87              | 4215 tags=35%, list=21%, signal=45% |
| MCALPAINPATHWAY                            | 24          | 0.60301137 | 1.7241952  | 0                | 0.1969163        | 0.93              | 3299 tags=38%, list=16%, signal=45% |
| DEATHPATHWAY                               | 33          | 0.5064673  | 1.7170511  | 0                | 0.1984698        | 0.96              | 4997 tags=48%, list=25%, signal=64% |

### Gene Sets enriched in control

| <i>NAME</i>                                | <i>SIZE</i> | <i>ES</i>  | <i>NES</i> | <i>NOM p-val</i> | <i>FDR q-val</i> | <i>FWER p-val</i> | <i>RANK AT MAX LEADING EDGE</i>      |
|--------------------------------------------|-------------|------------|------------|------------------|------------------|-------------------|--------------------------------------|
| BRENTANI_IMMUNE_FUNCTION                   | 52          | -0.5442895 | -2.103492  | 0                | 0                | 0                 | 5744 tags=58%, list=29%, signal=81%  |
| CITED1_KO_HET_UP                           | 27          | -0.5451648 | -1.787516  | 0                | 0.11554463       | 0.68              | 1863 tags=33%, list=9%, signal=37%   |
| HSA03050_PROTEASOME                        | 22          | -0.6002818 | -1.775813  | 0                | 0.12125231       | 0.72              | 6971 tags=86%, list=35%, signal=132% |
| HSA04950_MATURITY_ONSET_DIABETES_OF_THE_YO | 20          | -0.5684359 | -1.790119  | 0                | 0.12600382       | 0.67              | 4763 tags=60%, list=24%, signal=79%  |
| GPCRS_CLASS_A_RHODOPSIN_LIKE               | 136         | -0.4255976 | -1.80731   | 0                | 0.1272712        | 0.6               | 2377 tags=27%, list=12%, signal=31%  |
| GPCRDB_CLASS_A_RHODOPSIN_LIKE              | 175         | -0.4301317 | -1.817794  | 0                | 0.13727143       | 0.54              | 3702 tags=36%, list=18%, signal=44%  |
| HUMAN_TISSUE_THYMUS                        | 16          | -0.6413668 | -1.74808   | 0                | 0.1406226        | 0.82              | 3795 tags=63%, list=19%, signal=77%  |
| GH_HYPOPHYSECTOMY_RAT_DN                   | 15          | -0.6169487 | -1.737384  | 0                | 0.14207716       | 0.87              | 303 tags=13%, list=2%, signal=14%    |
| ANDROGEN_AND_ESTROGEN_METABOLISM           | 23          | -0.5665722 | -1.753078  | 0.04             | 0.1472102        | 0.82              | 3028 tags=39%, list=15%, signal=46%  |
| POMEROY_MD_TREATMENT_GOOD_VS_POOR_UP       | 29          | -0.5653929 | -1.821171  | 0                | 0.16306625       | 0.53              | 2324 tags=28%, list=12%, signal=31%  |
| HSA04080_NEUROACTIVE_LIGAND_RECEPTOR_INTER | 250         | -0.4003365 | -1.837287  | 0                | 0.17557299       | 0.45              | 3536 tags=32%, list=18%, signal=38%  |

## Supplementary Table 4: Primer, cloning, northern probe, siRNA, shRNA sequences

### A) Primer sequences

| Name                                                                                                          | sequence                         | purpose          |
|---------------------------------------------------------------------------------------------------------------|----------------------------------|------------------|
| lincRNA-VLDLR_FOR                                                                                             | AGCAGTCACATTCATCGCAC             | qRT-PCR          |
| lincRNA-VLDLR_REV                                                                                             | GAGGAATAGGTGCGAACTGC             | qRT-PCR          |
| lincRNA-SFMBT2_FOR                                                                                            | TCCCCTGAGAGAACATCGTC             | qRT-PCR          |
| lincRNA-SFMBT2_REV                                                                                            | AGCACGCTATTGGAGGAATG             | qRT-PCR          |
| lincRNA-ST8SIA3_FOR                                                                                           | CTCAGTGGGGAAGACTCCAG             | qRT-PCR          |
| lincRNA-ST8SIA3_REV                                                                                           | AGGAAGCCTGAGAGTTGGC              | qRT-PCR, 3,'RACE |
| lincRNA-LSM12_FOR                                                                                             | GTTATCCAACAACAGCAGCCGCAT         | qRT-PCR          |
| lincRNA-LSM12_REV                                                                                             | TGGGAATGACATCAGTGAGCTGGA         | qRT-PCR          |
| lincRNA-LPHN2_FOR                                                                                             | AGGCAGGACCTGTGGGTAG              | qRT-PCR          |
| lincRNA-LPHN2_REV                                                                                             | AACTGCTTTACACACCTTGCC            | qRT-PCR          |
| lincRNA-mir297_FOR                                                                                            | ACAGGGCTATGGAGTCATGG             | qRT-PCR          |
| lincRNA-mir297_REV                                                                                            | ATGGAACCTCTGACATCAACG            | qRT-PCR          |
| lincRNA-GRM8_FOR                                                                                              | ACCACCTCTAGGCATTCTGGACAA         | qRT-PCR          |
| lincRNA-GRM8_REV                                                                                              | AAGGCAGCAGCTTCCAATCATGTG         | qRT-PCR          |
| lincRNA-MANEA_FOR                                                                                             | AACCTGAACTCCACATGGCATCA          | qRT-PCR          |
| lincRNA-MANEA_REV                                                                                             | AATGCACAGGACTCAGCACAGGA          | qRT-PCR          |
| lincRNA-ZNF673_FOR                                                                                            | TAGAGGCAGAGTGTAAAGCATGCCA        | qRT-PCR          |
| lincRNA-ZNF673_REV                                                                                            | TTTCAGCGGCTTTATGGTCTGTGC         | qRT-PCR          |
| lincRNA-IL6_FOR                                                                                               | AGGCATCTTGGCATGAACCAAACC         | qRT-PCR          |
| lincRNA-IL6_REV                                                                                               | TATGCTAGGATTGAGGCAGCACCT         | qRT-PCR          |
| b-ACTIN_FOR                                                                                                   | GGCACCCAGCACAAATGAAGATCAA        | qRT-PCR          |
| b-ACTIN_REV                                                                                                   | TAGAAGCATTTGCGGTGGACGATG         | qRT-PCR          |
| GAPDH_FOR                                                                                                     | CATGTTTCGTCATGGGTGTGAACCA        | qRT-PCR          |
| GAPDH_REV                                                                                                     | AGTGATGGCATGGACTGTGGTCAT         | qRT-PCR          |
| OCT4_FOR                                                                                                      | TATGCAAAGCAGAAACCCCTCGTGC        | qRT-PCR          |
| OCT4_REV                                                                                                      | TTCCGGGCACTGCAGGAACAAATTC        | qRT-PCR          |
| NANOG_FOR                                                                                                     | TCCAGCAGATGCAAGAACTCTCCA         | qRT-PCR          |
| NANOG_REV                                                                                                     | CACACCATTGCTATTCTTCGGCCA         | qRT-PCR          |
| LAMIN-A/C_FOR                                                                                                 | TGAGAACAGGCTGCAGACCATGAA         | qRT-PCR          |
| LAMIN-A/C_REV                                                                                                 | CAAACCTCACGCTGCTTCCCATTGT        | qRT-PCR          |
| RUNX1_FOR                                                                                                     | CCCTAGGGGATGTTCCAGAT             | qRT-PCR          |
| RUNX1_REV                                                                                                     | TGAAGCTTTTCCCTCTTCCA             | qRT-PCR          |
| AFP_FOR                                                                                                       | AGCTTGGTGGTGGATGAAAC             | qRT-PCR          |
| AFP_REV                                                                                                       | CCCTCTCAGCAAAGCAGAC              | qRT-PCR          |
| GATA4_FOR                                                                                                     | CTAGACCGTGGGTTTTGCAT             | qRT-PCR          |
| GATA4_REV                                                                                                     | TGGGTTAAGTGCCCTGTAG              | qRT-PCR          |
| NCAM_FOR                                                                                                      | ATGGAAACTCTATTAAGTGAACCTG        | qRT-PCR          |
| NCAM_REV                                                                                                      | TAGACCTCATACTCAGCATTCCAGT        | qRT-PCR          |
| GATA2_FOR                                                                                                     | CACAACATACATGGAACCCGCGCAGCT      | qRT-PCR          |
| GATA2_REV                                                                                                     | TGCAACAAGTGTGGCGGCACATCT         | qRT-PCR          |
| P53_FOR                                                                                                       | TTC AGA TCC GTG GGC GTG AG       | qRT-PCR          |
| P53_REV                                                                                                       | ATG GCG GGA GGT AGA CTG AC       | qRT-PCR          |
| 382_lincRNA_VLDLR_FOR                                                                                         | AGACGCAGGTAACGCCAGGCAACGT        | ChIP             |
| 383_lincRNA_VLDLR_REV                                                                                         | GGCAGCTGAGAGGATGAAAAGGCCT        | ChIP             |
| 386_lincRNA_VLDLR_FOR                                                                                         | CCTCACCAACCAGTCTTTTGAAGGA        | ChIP             |
| 387_lincRNA_VLDLR_REV                                                                                         | CCCTCTTGGACCTGGTTAACGTGAC        | ChIP             |
| 360_lincRNA_SFMBT2_FOR                                                                                        | ACAGGCTTGAACCAAGATTGTGGG         | ChIP             |
| 361_lincRNA_SFMBT2_REV                                                                                        | CTCCTAAACAGCTGCTTCGTCTGCA        | ChIP             |
| 372_lincRNA_SFMBT2_FOR                                                                                        | CAGCCCAGTAAGGTGGATCAGAAGT        | ChIP             |
| 373_lincRNA_SFMBT2_REV                                                                                        | CCAGGCTTGCCAACCTTCTACTCCTT       | ChIP             |
| 594_lincRNA_ST8SIA3_FOR                                                                                       | GTGGTGGAAATGTCATCAGTTAAGGCG      | ChIP             |
| 594_lincRNA_ST8SIA3_REV                                                                                       | TCTAGGAGTCCACCTCATAAGCAC         | ChIP             |
| ChIP_control_FOR                                                                                              | GAGGTCTCGTATTTGCTGCATCGTA        | ChIP             |
| ChIP_control_REV                                                                                              | GCTAATTTCCCTTCTCCACCCCAACCA      | ChIP             |
| Primers for detection of endogenous/transgenic/total OCT4, SOX2, KLF4, MYC: see <sup>8</sup> and <sup>2</sup> |                                  |                  |
| lincRNA-ST8SIA3_Northern_FOR                                                                                  | TTCTTCCAGGTCTCAGGAATGGGA         | Northern Blot    |
| lincRNA-ST8SIA3-Northern_REV                                                                                  | AGGCATGAGGAGTCATTGAAGGT          | Northern Blot    |
| lincRNA-ST8SIA3_cDNA_FOR                                                                                      | GGTGAATAAACAGCCATGTTGCTCACA      | cDNA cloning     |
| lincRNA-ST8SIA3_cDNA_REV                                                                                      | TTTATTTTTTGGAGAACTGTCATACCGTTTCC | cDNA cloning     |

## B) LincRNA-ST8SIA3/lincRNA-RoR cDNA sequence

GGTGAATAAACAGCCATGTTGCTCACACAAAGCCTGTTTGGTGGTCTCTTCACACGGACGC  
TCATGAAATTTGGTGATGTGACTCGGATAGGGGGACCTCCCTTGGGAGATCAGTACCCGTGC  
CTCCTGCTCTTTGCTCCGTGAGAAAGATCCACCTACAACCTCAGGTCCTTAGACCAACCAGC  
CCAAGAAACATCTACCAATTTCAAATCCAGACCCCACTGGAATCGGACTGTCCAACCTCAC  
CTGACAGCCACTCCCACAGCCGCTGGAACCTGGCCCAAGGCTCTCTGACTCCTTCCCAGAT  
CTTCTTGGCTTAGCGGCTGAAGACTGACGCTGCCCGATCGCCTCGGAAGCCCCCTAGACCA  
TCACGGACGCCGAGCTTCGGGTAACCTCACAGTGAAGAAACACAACCTACAGATTTCTACC  
TGGTGCATGGCCATCGCTCATGAAGACTACAACCTCCAGCTTCCTTTGAGAAAAAGAGGAC  
TTGATGGCATTGTCGCTAAGTAAGAAATAATGTGTGTGACTTCAGGGTTGCCCCCTTAAAGG  
GAGGGGACATTTTCCATCCTGCTGTTTCCAGAGTATGGATGTGATGAGAGACATCTTGGATGAT  
GCAGAGGAGGTGAACACCCCAAGGACAATGAAACCACAGGAGAGAAAGAGCCTGCGCTGGC  
CCATCTAGCACAGCCACTGGACACAGGGACCACCTGCCTCTGCACTCTTATGGAAGGAGGA  
AATCTAACTTTCCAGTTTAAAGGCACTGTTACTTTGGGCTCCTGTTACATAACTGTGGCAGAA  
TGAAGGTTCAACATGGAAACTGGCAATGTTGAAGAAACATAAAGTTTATTGCTTGAATATCT  
GAAGTTGTGGACTCAATCTCATACTGCTCCACTTATGAGTTATAGTTCTTCCAGGTCTCAGG  
AATGGGATCAGCAGGTCTCAGGGTGTACTCTCCTGGATCTCTCACCAGCCACCTCAAACCA  
GCTGCCATAGCCTGTCCACTTCCACTCCAATCTTCTCTTCCCTTCATCACCTCCCTTGCACACC  
CTGATAACCTCGAAAGAGAATCTTCCCAAGGCTCTGTTCCAAACACATCGCCACTCTGCTTA  
GAACCTTCAATGACTCCTCATGGCCTAGGAGGTTTCTCTCCCATCTGGATCCAGCTGACGTT  
CCCAGCACCTTCTCCTGACTCCTGTCTTTTCTTGAACCAGTTCTGCCCAACAAGGAGGAAAG  
GGCTGACAGAGTGAAAGTCCCAGGGCATGTGGGAATGTGACTCTTTTCACTTTAAATTCTAT  
GACTGGAAAGTTTTGGGCAGAGTTGGACATGTGCACTTAGCTTCCAGAAGACAGAATCCTTT  
TAAAAGAGTCAGAGAAAACACTGGCTTCTGCCATGACATGAGATACAGACAGGAGAGTTG  
GGAAGCTTTTTAAAGATGGCACTATGACTACAATCACAGAACTCTCCATGAGGAAGTAAAA  
GAAAGCACCTGCAACACTCCAGCTATGCAGACCACTCTGTAATGGGCTCAGATCTGGACAG  
GTGTGTGGAAAGGTGGGTCAACAGGTCAGGCGTCACAGACTTGGAAACATTCATGGTGGAAA  
AGAAAAAGCCCCAAAGAAGAGACTTCAGGATAAATGAGAAAATACTCAAGACAGCAAAAAGTC  
TCTTTTAGAAATGTTGGAGAAAGAACACTTAATGTCAGGAGTTACTGTTGATTGATGGCCTTA  
CTGTGTAGCAGGTGAGAAACCCATTGTTTCAAGTTCCCTAAAGTCACCCTATTCTCCAATCATC  
CTATGGAGGGGGAACCATGATGGTTATCCCCATCTTATAAATAAAGCAACAGAGGCTTAGAA  
GGACGAACTTTTTTCTCAAGGTTACCCAGATCATTTTGCAGAAGTCCCTAGATTTGAATCAT  
GCTCTTGCTTTGAGGTTAAAGACACAGGGGAAGTCAACTCCTTATCTCCTATATCCTGAATA  
GGGAAAACCAAACATTGTCAAGAGGAGAGGAAGCCTGAGAGTTGGCATGAATCAGAGTGCT  
GGGAGTCTGGAGTCTTCCCACTGAGTTGATGATGGAACAGTAGAGTGGGGCCTGAGCCC  
CGTTAGGGCATGAGCTGCTGAATGATTCATGTGAACACCATGCACATGGGAGTGAGGTTTT  
GAGCAGTGTGCCACAGGAGCCTACCCTCAGGCCCCACCATAAAAATGTAGGGCCAGTCCTAC  
ATTTTATCAATGACTTGCCTGAACACAGAAAATGTGGATACAACCAAAGGTAACAATCCAAT  
TAAAAAATGGACAAAAAATTTGAATAAACATTTCTCAAAGAAGATATACAAATGATCAAAAA  
GCATATGAAAAAATGCTCAACATCGCTAATTGTAAGAGAAATGCAAATCAAACTATAATGAG  
ATACCACCTTATATTGATTAGGAAGACTGCTATAAAAATAGTAAACAAACAAACAAACAAAGT  
AAGTCTTGGGAGGATGCAGAGAAATTAATTTTTGTGCACTGTTAGTGGGAATGTAAAT  
GGTGCAGCTGTTACGGGAAACGGTATGACAGTTCCTCAAAAAATAAAA



## C) siRNA and shRNA sequences

### siRNAs

| <i>NAME</i>             | <i>SEQUENCE</i>                                             |
|-------------------------|-------------------------------------------------------------|
| OCT4                    | AGCAGCTTGGGCTCGAGAA                                         |
| Ctrl siRNA1             | AllStars Negative Control siRNA (Qiagen #1027280)           |
| Ctrl siRNA2             | siGENOME Non-targeting siRNA #1 (Dharmacon #D-001210-01-05) |
| GAPDH control siRNA     | siGENOME GAPDH Control siRNA (Dharmacon #D-001140-01)       |
| LincRNA-ST8SIA3 siRNA1  | GGAGAGGAAGCCTGAGAGT                                         |
| LincRNA-ST8SIA3 siRNA2  | GGTTAAAGACACAGGGGAA                                         |
| LincRNA-ST8SIA3 siRNA3  | CTTCAGGATAAATGAGAAA                                         |
| LincRNA-ST8SIA3 siRNA 4 | CCTGAGAGTTGGCATGAAT                                         |
| si-p53                  | siGENOME SMARTpool (Dharmacon)                              |

### shRNA Constructs

| <i>NAME</i>                                        | <i>SEQUENCE</i>                                                |
|----------------------------------------------------|----------------------------------------------------------------|
| incRNA-ST8SIA3/lincRNA-RoR /linc-sh1 (sense oligo) | CCGGAAGCCTGAGAGTTGGCATGAATTCAAGAGATTCATGCCAACTCTCAGGCTTTTTTTTG |
| lincRNA-ST8SIA3/lincRNA-RoR/linc-sh2 (sense oligo) | CCGGGAGAGGAAGCCTGAGAGTCTCGAGACTCTCAGGCTTCCTCTCCTTTTTG          |
| lincRNA-SFMBT2 (sense oligo)                       | ccggAAGGCTAGAAACCCCATCTGTTCAAGAGACAGATGGGGGTTTCTAGCCTTtttttg   |
